# Supplementary material for: Enhancement of the in vivo persistence and antitumor efficacy of CD19 chimeric antigen receptor T cells through the delivery of modified TERT mRNA
Source: PubMed Central journal article supplement (PMC4860832; doi:10.1038/celldisc.2015.40), 2015-12-08
Supplement: celldisc201540-s1.pdf [file celldisc201540-s1.pdf]

## **Supplementary Materials and Methods**

### *Western blot*

The protein was harvested after washing the cells once with PBS, followed by lysing in RIPA buffer. The protein was subjected to electrophoresis on NuPAGE Novex Tris-Acetate Gels, followed by transfer to a PVDF membrane for 2 hours at 35 V, subsequently hybridized to anti-alpha tubulin at 1:1000 (Sigma, MO, USA) and anti-CD3-zeta antibody at 1:1000 or at 1:500 (Abcam, Cambridge, UK) and incubated overnight at 4°C. Secondary detection was performed using infrared (680 nm and 800 nm) antibodies (LI-COR) and the Odyssey imager (LI-COR). The total intensity of each band was quantified using the ImageJ program.

### *Hematoxylin-eosin stain*

Different tissues of CAR-T-cell treated Raji NPG/Vst mice were inflated with 4% paraformaldehyde and fixed in the same fixative for 24 hours. Samples were processed and paraffin embedded. Serial sections were cut at 5 µm thickness and stained with hematoxylin and eosin (H&E). After examined by light microscopy, the tissues of model mice were infiltrated with a large number of lymphoma cells.

## **Supplementary Figure Legends**

**Figure S1. Generation of third-generation costimulatory CD19 CAR-modified T-cells and their in vitro immunobiology.**

**(A)** Schematics of the pRRL-EF1A-19CAR3. This vector was modified with the EF1 $\alpha$  promoter, and the anti-CD19 CAR comprises the FMC63-ScFv, the transmembrane and the intracellular domain of human CD28, activation domain of 41-BB and cytosolic signaling domains of CD3 $\zeta$ . **(B)** The transfection efficiency of CD19 CAR lentiviral vector was demonstrated using flow cytometry at 72 hours after infection. T cells were stained with biotin-labeled polyclonal goat anti-mouse-F(ab')<sub>2</sub> antibodies to detect the anti-CD19 CAR, and another sample of T cells were stained with biotin-labeled normal polyclonal goat IgG antibodies as an isotype control. **(C)** RT-PCR and Western blot illustrated the expression of CD19CAR in modified T cells at 72 hours after transfection. Western blot results from whole T-cell lysates probed with an anti-CD3-zeta mAb. The unmodified T-cell line and CD19 CAR-modified T-cell clones displayed a 21-kDa band consistent with the wild-type CD3- $\zeta$  chain. In addition, CD19CAR-T cells showed a second band of approximately 70 kDa, consistent with the introduced chimeric CD3- $\zeta$  chain. **(D)** Surface molecule marker of the CD19CAR T cells after 2 weeks in vitro culture. **(E)** The cytokines secreted from CD19CAR-T cells after co-culture with CD19<sup>+</sup> tumor cells were detected using ELISA. The CD19 CAR T cells were co-cultured with CD19<sup>+</sup>Raji tumor cells or CD19<sup>-</sup> K562 tumor cells at E:T ratios of 1:1, 10:1, and 25:1 in fresh medium without rhIL-2 for 4 hours, and subsequently the supernatants of these cultures were collected, centrifuged and detected by ELISA. The data are presented as the mean  $\pm$  SD of results from 3 independent experiments. \*P < 0.05, \*\*\*P < 0.001. **(F)** CD19 CAR-T cells show the specific tumor killing ability of CD19<sup>+</sup> tumor cells. Raji cells were CD19<sup>+</sup> human Burkitt's lymphoma cells, and K562 cells were CD19<sup>-</sup> human lymphoma cells. The target cells were incubated with CD19

CAR-specific CD8<sup>+</sup> T cells at E:T ratios of 1:1, 10:1, and 25:1, and after 4 hours of co-culture, the cytotoxicity of CD19 CAR-T cells was detected using a flow cytometric CTL assay. The data are presented as the mean  $\pm$  SD of results from 3 independent experiments. \*P < 0.05, \*\*\*P < 0.001.

**Figure S2. Histologic analysis of tissue sections of sacrificed mice.**

(A) Normal kidney tissue section of healthy NPG/Vst mice as control. (B) The kidney tissue section of CAR-T-cell treated Raji NPG/Vst mice model, all the tissues were conserved when the mice were dying. (C) Normal lung tissue section of healthy NPG/Vst mice. (D) The lung tissue section of CAR-T-cell treated Raji NPG/Vst mice. (E) Normal liver tissue section of healthy NPG/Vst mice. (F) The liver tissue section of CAR-T-cell treated Raji NPG/Vst mice. Scale bar was 100  $\mu$ m.

**Figure S3. Persistence of exogenous TERT mRNA and the telomere length in long-term culture.**

(A) Persistence of exogenous hTERT mRNA were measured using RT-PCR after once independent electroporation at continuous interval time points. (B) The telomere length of TERT-CAR-T cells was initially measured at 48 h (2 days) after the third transfection, then the telomere length of TERT-CAR-T cells was measured every 10 days.

**Figure S4. Cytokine release ability and cytolytic activity of TERT-CAR-T cells when co-cultured with CD19<sup>+</sup> K562 cells.**

(A-D) Cytokine release of TERT-CAR-T cells was detected by ELISA after co-culture with

CD19<sup>-</sup> K562 cells at different E/T ratio (1:1, 10:1, 25:1), and four types of cytokines (IL-2, IL-10, IFN- $\gamma$ , and TNF- $\alpha$ ) were detected. The data are presented as the mean  $\pm$  s.d. of results from 3 independent experiments. **(E)** CD19-specific CTL of TERT-CAR-T cells was detected by flow cytometry. **(F)** Cytolytic activity was determined after 4 hours of co-culture. The data are presented as the mean  $\pm$  s.d. of results from 3 independent experiments.
